# Supplementary material
Source: Springer Nature journal article supplement (https://www.springermedizin.de/resource/supplementary/12889_2010_3067_MOESM5_ESM.pdf/9487914)

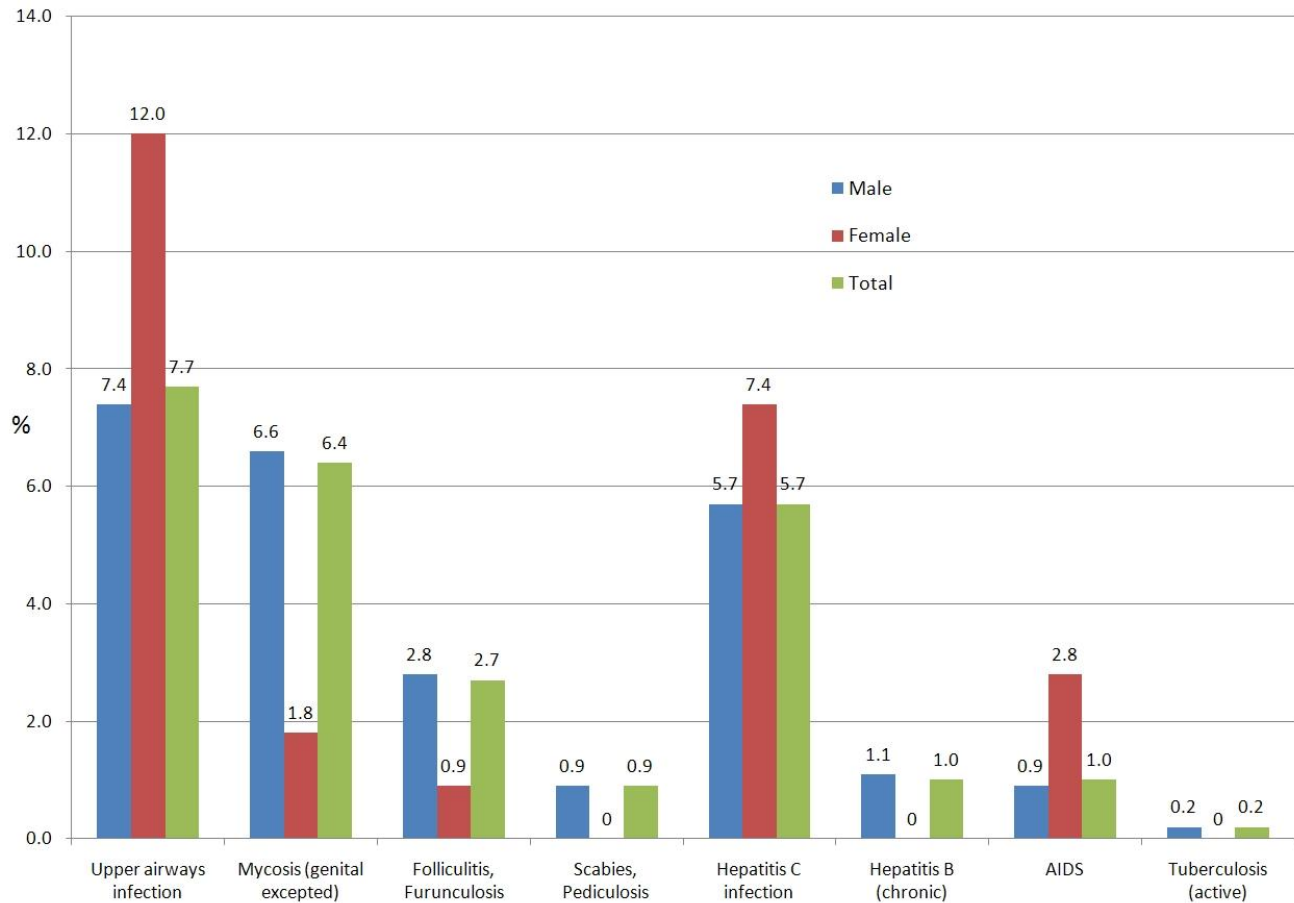

Supplement: MOESM5 [file 9487914]
